# Supplementary material for: Antimicrobial Activity and Stability of Short and Long Based Arachnid Synthetic Peptides in the Presence of Commercial Antibiotics
Source: PubMed Central journal article supplement (PMC6273820; doi:10.3390/molecules21020225), 2016-02-17
Supplement: molecules-21-00225-s001.pdf [file molecules-21-00225-s001.pdf]

# Supplementary Materials: Antimicrobial Activity and Stability of Short and Long Based Arachnid Synthetic Peptides in Presence of Commercial Antibiotics

Ivan Arenas, Elba Villegas, Oliver Walls, Humberto Barrios, Ramon Rodríguez and Gerardo Corzo \*

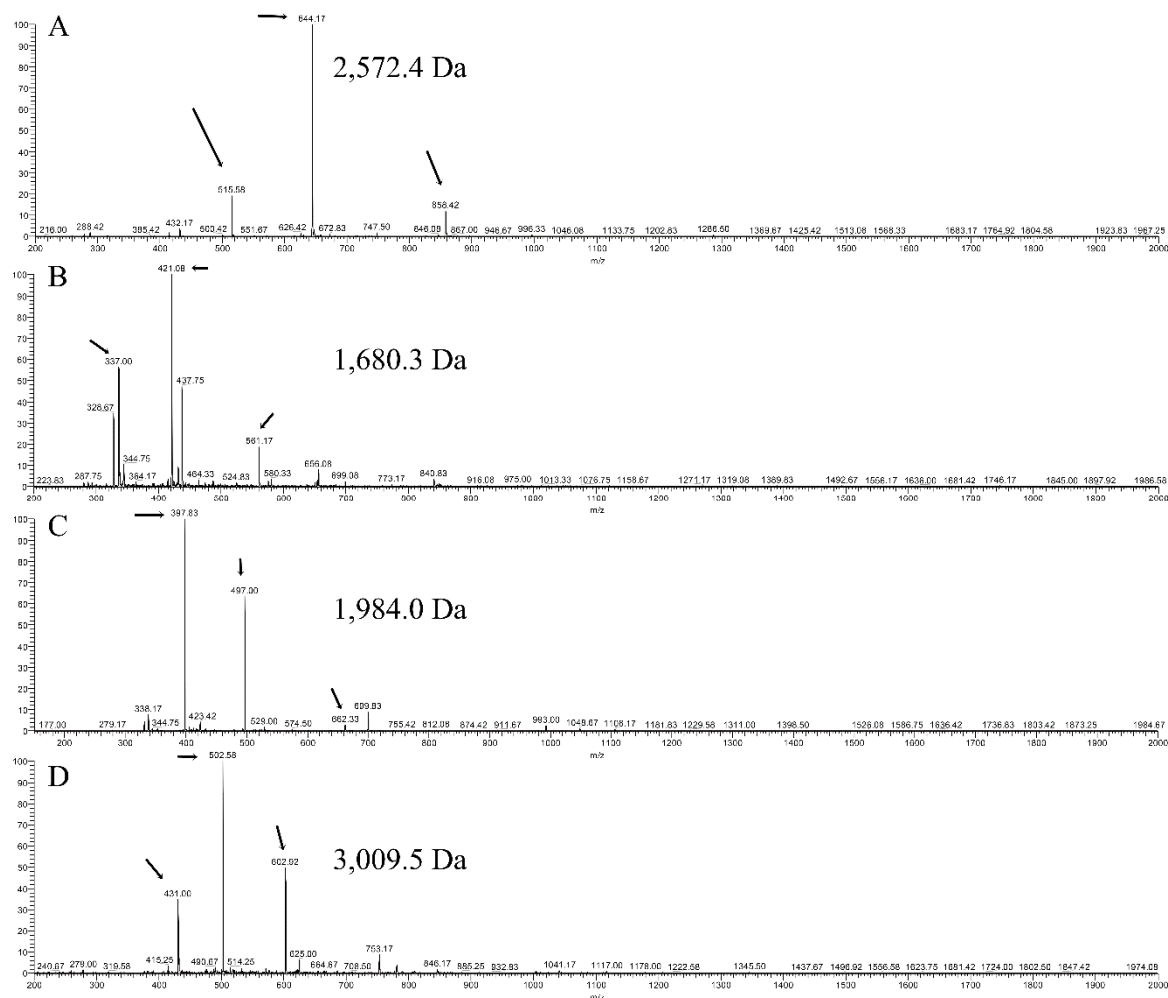

**Figure S1.** Mass spectra of the AMPs. The arrows indicate the main  $m/z$  ions of each peptide. (A) Pin2[G]; (B) Pin2[14]; (C) P18K and (D) FA1.
